## A binary effector module secreted by a type VI secretion system

Yasmin Dar<sup>1,#</sup>, Biswanath Jana<sup>1,#</sup>, Eran Bosis<sup>2,\*</sup>, & Dor Salomon<sup>1,\*</sup>

<sup>1</sup> Department of Clinical Microbiology and Immunology, Sackler Faculty of Medicine, Tel Aviv University, Tel Aviv 6997801, Israel.

<sup>2</sup> Department of Biotechnology Engineering, ORT Braude College of Engineering, Karmiel 2161002, Israel.

# These authors contributed equally to this work.

\* For correspondence: [dorsalomon@mail.tau.ac.il](mailto:dorsalomon@mail.tau.ac.il) (DS); [boasis@braude.ac.il](mailto:boasis@braude.ac.il) (EB)

### ABSTRACT

Gram-negative bacteria use type VI secretion systems (T6SSs) to deliver toxic effector proteins into neighboring cells. Cargo effectors are secreted by binding non-covalently to the T6SS apparatus. Occasionally, effector secretion is assisted by an adaptor protein, although the adaptor itself is not secreted. Here, we report a new T6SS secretion mechanism, in which an effector and a co-effector are secreted together. Specifically, we identified a novel periplasm-targeting effector that is secreted together with its co-effector, which contains a MIX (marker for type SIX effector) domain previously reported only in polymorphic toxins. The effector and co-effector directly interact, and they are dependent on each other for secretion. We termed this new secretion mechanism “a binary effector module”, and we show that it is widely distributed in marine bacteria.

## 25 INTRODUCTION

26 One of the most diverse bacterial toxin delivery systems is the type VI secretion system (T6SS);  
27 it targets toxins, termed effectors, into either bacteria or eukaryotic neighboring cells in a  
28 contact-dependent manner (Pukatzki *et al*, 2006; Mougous *et al*, 2006; Hood *et al*, 2010;  
29 Pukatzki *et al*, 2007). Effectors possessing antibacterial activities are encoded together with a  
30 cognate immunity protein that prevents self-intoxication by physically binding the effector and  
31 antagonizing its activity at its subcellular destination (i.e., in the cytoplasm, membrane, or  
32 periplasm) (Russell *et al*, 2012, 2011).

33 T6SS effectors are loaded onto a secreted tail tube composed of stacked hexameric rings of  
34 Hcp proteins, which are capped by a spike complex comprising a VgrG trimer and a PAAR  
35 repeat-containing protein (hereafter, referred to as PAAR) that sharpens the tip of this structure  
36 (Nazarov *et al*, 2017; Wang *et al*, 2017; Shneider *et al*, 2013). The tail tube is propelled out of  
37 the cell by a contracting sheath structure that engulfs it inside the secreting bacterium (Basler *et al*,  
38 2012). Effectors are deployed once the tail tube has penetrated a recipient cell.

39 Several mechanisms mediating the translocation of T6SS effectors into recipient cells have  
40 been characterized. The first characterized mechanism was the delivery of specialized effectors  
41 (also known as 'evolved effectors') (Pukatzki *et al*, 2007), a term referring to the three secreted  
42 tail tube components of the T6SS (Hcp, VgrG, and PAAR) when they are fused to a C-terminal  
43 toxin domain (Ma *et al*, 2017; Pukatzki *et al*, 2007; Shneider *et al*, 2013). A second type of  
44 effectors, known as cargo effectors, are toxin domain-containing proteins that non-covalently  
45 attach to one of the three secreted tail tube components (Bondage *et al*, 2016; Flaugnatti *et al*,  
46 2016; Jana *et al*, 2019; Wettstadt *et al*, 2019; Hachani *et al*, 2014; Flaugnatti *et al*, 2020).

47 Many cargo effectors and PAAR-containing specialized effectors require cognate adaptor  
48 proteins. Adaptors function as chaperones that bind the effector and contribute to its stability  
49 and loading onto the T6SS tail tube. Four adaptor domains (DUF4123, DUF1795, DUF2169,  
50 and DUF2875) have been experimentally validated (Unterweger *et al*, 2015; Liang *et al*, 2015;  
51 Alcoforado Diniz & Coulthurst, 2015; Cianfanelli *et al*, 2016; Quentin *et al*, 2018; Bondage *et al*,  
52 2016; Ahmad *et al*, 2020; Berni *et al*, 2019); co-adaptors have also been reported to  
53 occasionally participate in this process (Burkinshaw *et al*, 2018). Moreover, Hcp serves as a  
54 chaperone for several effectors that are loaded inside the Hcp tube (Silverman *et al*, 2013).  
55 Adaptors are commonly encoded adjacent to the effector, although there have been reports of  
56 adaptors encoded at a distant genetic locus (Ahmad *et al*, 2020). Importantly, the adaptors are  
57 not secreted, and the mechanism ensuring their intracellular retention and their dissociation  
58 from the effector remains unclear.

59 Members of the *vibrionaceae* family are Gram-negative bacteria prevalent in aquatic  
60 ecosystems (Boyd *et al*, 2015); they include established and emerging pathogens of humans  
61 and marine animals (Horseman *et al*, 2013). Many vibrios harbor at least one T6SS in their  
62 genome (Dar *et al*, 2018). These T6SSs are employed in interbacterial competition, anti-  
63 eukaryotic toxicity (virulence or antagonizing predation), or both (Salomon *et al*, 2013; Ray *et al*,  
64 2017; Pukatzki *et al*, 2006; MacIntyre *et al*, 2010; Salomon *et al*, 2015; Hubert & Michell, 2020;  
65 Speare *et al*, 2018). *Vibrio parahaemolyticus*, a widespread emerging pathogen, is a major  
66 cause of seafood-borne gastroenteritis (Newton *et al*, 2012; Zhang & Orth, 2013) and of acute  
67 hepatopancreatic necrosis disease (AHPND) in shrimp (Tran *et al*, 2013; Lai *et al*, 2015).  
68 Pathogenic isolates of this bacterium encode a T6SS, termed T6SS1 (Li *et al*, 2017; Salomon *et al*,  
69 2013; Yu *et al*, 2012), whose closely homologous systems are widespread in vibrios and  
70 other marine bacteria (Dar *et al*, 2018; Salomon *et al*, 2015; Ray *et al*, 2017). The activities and  
71 effector repertoires of this T6SS have been investigated in several *Vibrio* strains. Notably, in all  
72 four *V. parahaemolyticus* isolates in which T6SS1 has been experimentally investigated, as well

73 as in the investigated homologous T6SSs in *V. alginolyticus* 12G01 and in *V. proteolyticus*  
74 NBRC 13287, a tricistronic operon is found at the beginning of the T6SS cluster (Salomon *et al*,  
75 2014a; Ray *et al*, 2017; Salomon *et al*, 2015; Jana *et al*, 2019; Fridman *et al*, 2020). This  
76 tricistronic operon, corresponding to *vp1388-vp1390* in the *V. parahaemolyticus* type strain  
77 RIMD 2210633 (Fig. 1A), was implicated in interbacterial competition (Salomon *et al*, 2014a).  
78 Interestingly, both VP1388 and VP1390, as well as their *V. alginolyticus* and *V. proteolyticus*  
79 homologs, are secreted in a T6SS1-dependent manner (Ray *et al*, 2017; Salomon *et al*, 2015,  
80 2014a). VP1389, encoded by the middle gene of the tricistronic operon, and its homologs  
81 contain an N-terminal signal peptide for periplasmic localization (Fig. 1A).

82 Previously, we proposed that VP1388, containing a MIX (Marker for type sIX effector) domain  
83 that indicates a secreted T6SS substrate, is a T6SS effector and that VP1389 is an immunity  
84 protein (Salomon *et al*, 2014a); deletion of both genes render a prey strain sensitive to T6SS1-  
85 mediated attacks by a parental competitor, for which VP1388 is required. Exogenous  
86 expression of VP1389 in the prey restores immunity. However, the role of the third operon-  
87 encoded protein, VP1390, and the antibacterial activity mediated by this operon have remained  
88 unknown.

89 Here, we investigated the roles and activities of the proteins encoded by this T6SS-associated  
90 operon. Importantly, we found that both VP1388 and VP1390 are required for the antibacterial  
91 activity mediated by the tricistronic operon, and that their secretion is co-dependent.  
92 Furthermore, we demonstrated that VP1388 and VP1390 interact directly and are loaded  
93 together on the T6SS tail tube. Lastly, we revealed that VP1390, rather than VP1388, mediates  
94 antibacterial toxicity in the periplasm; its activity resulted in distinct morphological changes that  
95 led to cell lysis. We propose that VP1390 is a newly identified antibacterial T6SS effector that  
96 uses a novel secretion mechanism, whereby the MIX domain-containing VP1388 serves as its  
97 secreted co-effector.

98

## 99 RESULTS

### 100 Homologous operons of *vp1388-vp1390* are widespread in marine bacteria

101 Prior to characterizing the functions of the three operon-encoded proteins, VP1388, VP1389,  
102 and VP1390, we first set out to determine the operon's distribution and conservation. To this  
103 end, we identified homologs of these three proteins in available bacterial genomes and  
104 investigated their genomic neighborhoods. Operons that encode homologs of all three proteins  
105 (hereafter, referred to as triads) were found in genomes of 1375 marine bacterial strains  
106 harboring T6SS, mostly belonging to the *vibrionaceae* family (Fig. 1 and Supplementary  
107 Datasets S1 and S2). In some genomes (e.g., *Aliivibrio*), more than one copy of the operon was  
108 detected. Often, multiple copies of the putative immunity protein, homologous to VP1389, were  
109 present within the operon or flanking it (Fig. 1A and Supplementary Dataset S2). These  
110 additional copies may represent orthologs that have been acquired via horizontal gene transfer  
111 or that have evolved to protect against non-kin toxins, since they often bear more sequence  
112 similarity to proteins encoded by other bacterial strains than to their neighbors. Notably, ~65% of  
113 the homologous operons were found in proximity to T6SS core proteins, usually at the edges of  
114 T6SS gene clusters (Supplementary Dataset S3), indicating their association with this secretion  
115 system.

116 Interestingly, homologs of VP1388 were almost exclusively found in triads. When an operon  
117 was truncated at the end of a contig or it included pseudogenes at the edge, thus hampering our  
118 ability to confidently determine the genetic composition of the operon, it was denoted as  
119 "Truncated/pseudo" (Fig. 1B). Nevertheless, a handful of instances in which VP1388 was found

120 alone or only with a VP1390 homolog were detected (denoted as “Others” in Fig. 1B).  
 121 Interestingly, we also found various genomes in which a VP1388 homolog is absent (e.g., in  
 122 *Pseudoalteromonas*, *Bermanella*, and *Desulfoluna*); however, VP1390 and VP1389 homologs  
 123 are present (denoted as “Dyads”; Fig. 1B). This observation suggests a link between VP1390  
 124 and VP1389. Remarkably, genomes encoding dyads did not encode a T6SS that is similar to *V.*  
 125 *parahaemolyticus* T6SS1, as opposed to the vast majority of genomes encoding a triad.

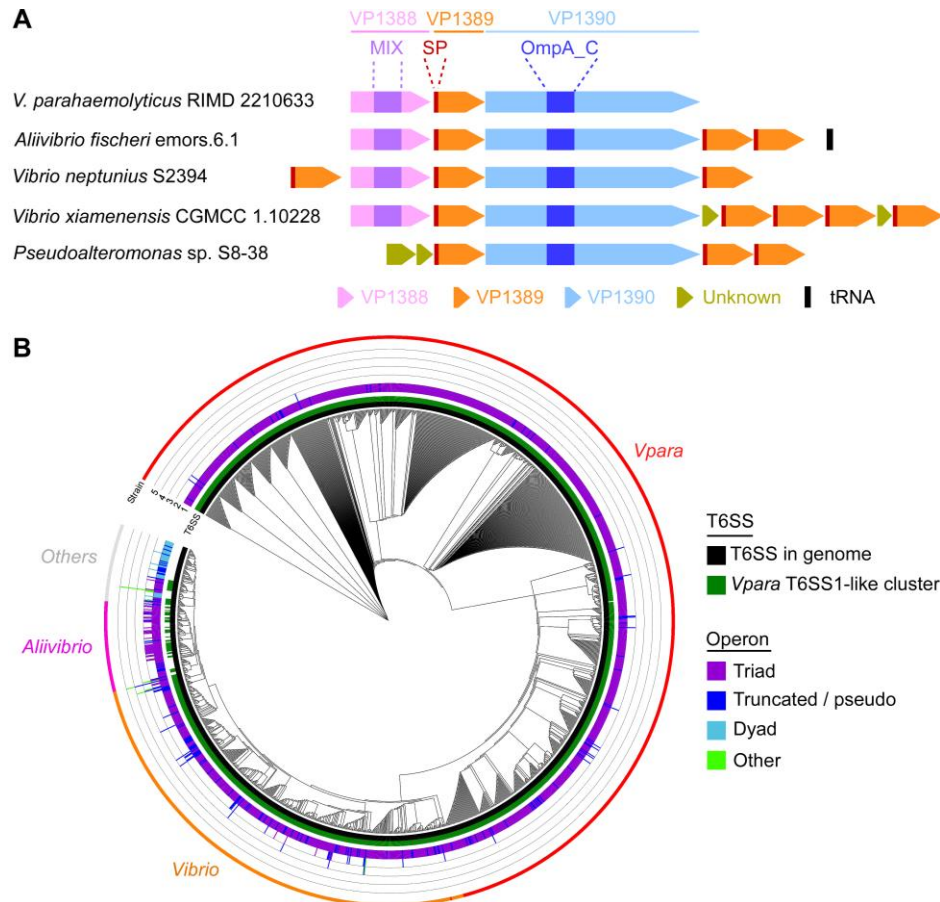

126

127 **Figure 1. *vp1388-90* homologous operons are widespread in T6SS-encoding marine**  
 128 **bacteria. A)** Selected examples of the genetic structure of *vp1388-90* homologous operons. SP,  
 129 signal peptide; MIX, Marker for type sIX effector. **B)** Distribution of *vp1388-90* homologous  
 130 operons in bacteria. A phylogenetic tree of bacteria encoding homologous operons, based on  
 131 the DNA sequences of *rpoB*. The presence or absence of T6SS in each genome is denoted in  
 132 the inner rings (black and dark green). Intermediate bars indicate the number of complete (triad)  
 133 and partial (dyad or truncated) homologous operons identified in each genome. An external ring  
 134 denotes the group to which the bacterial strains belong. *V. parahaemolyticus* (*Vpara*) were  
 135 annotated separately (red), as were *Aliivibrios* (pink).

136

### 137 **Only VP1389 is required for immunity against T6SS1-mediated toxicity**

138 In a previous work, we showed that VP1389 was required for immunity against T6SS1-mediated  
 139 aggression (Salomon *et al*, 2014a). However, we did not directly investigate whether VP1388

140 and VP1390 play a role in immunity. To test this, we deleted each of the three genes, *vp1388*,  
 141 *vp1389*, and *vp1390*, individually and determined the ability of each mutant to defy intoxication  
 142 by a wild-type attacker during competition. As shown in Fig. 2A, only *vp1389* was necessary for  
 143 immunity against a T6SS1-mediated attack, whereas neither *vp1388* nor *vp1390* was required.  
 144 Notably, deletion of *vp1388* resulted in slightly lower prey growth; however, this was not due to  
 145 T6SS1-mediated toxicity of the attacker (Supplementary Fig. S1). These results indicate that the  
 146 two secreted proteins, VP1388 and VP1390, do not play a role in immunity against T6SS1.

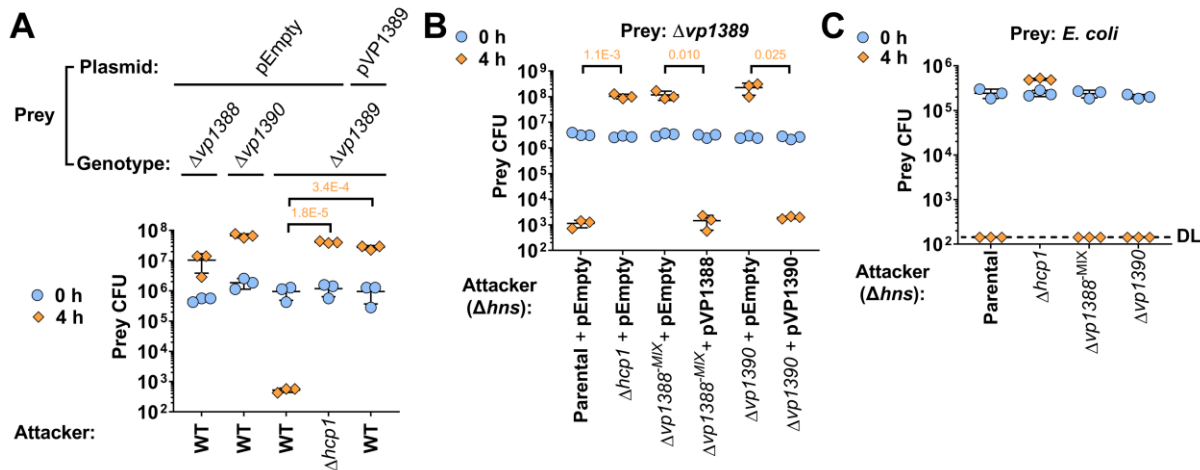

147  
 148 **Figure 2. VP1388 and VP1390 are required for antibacterial toxicity, not immunity. A-C)** Viability  
 149 counts of the indicated *V. parahaemolyticus* (A-B) or *E. coli* (C) prey strains before (0 h) and after (4 h)  
 150 co-incubation with the indicated *V. parahaemolyticus* attackers on media containing 3% NaCl at 30 °C. In  
 151 A, prey strains contain either an empty plasmid (pEmpty) or a plasmid for arabinose-inducible expression  
 152 of VP1389 (pVP1389). In B and C, prey strains contain an empty plasmid that provides a selection  
 153 marker, and the attackers are derivatives of a  $\Delta hns$  mutant (parental). In B, the attackers contain an  
 154 empty plasmid, or plasmids for the arabinose-inducible expression of VP1388 (pVP1388) or VP1390  
 155 (pVP1390). Data are shown as the mean  $\pm$  SD. Statistical significance between samples at the 4 h  
 156 timepoint by an unpaired, two-tailed Student's *t*-test is denoted above. A significant difference was  
 157 considered as  $P < 0.05$ . DL, assay detection limit.  $\Delta hcp1$  was used as a T6SS1<sup>-</sup> control strain.

158  
 159 **Generating a *vp1388* mutant that does not affect VP1390 expression**

160 Before performing additional experiments to investigate the tricistronic operon, we determined  
 161 whether the single gene deletions that we used in Fig. 2A affected the expression of either  
 162 VP1388 or VP1390. Although deletion of *vp1390* did not affect the expression of VP1388,  
 163 deletion of *vp1388* resulted in elevated expression of VP1390 (Supplementary Fig. S2A). Since  
 164 we did not wish to conduct subsequent experiments with a mutant in which the VP1390  
 165 expression levels are drastically elevated, we generated an alternative *vp1388* mutant in which  
 166 the region encoding the MIX domain (corresponding to amino acids 242-423 (Salomon *et al*,  
 167 2014a)) was deleted. The resulting mutant, hereafter termed  $\Delta vp1388^{MIX}$ , exhibited no  
 168 detectable expression of VP1388 but retained VP1390 levels comparable to those of the wild-  
 169 type strain (Supplementary Fig. S2A). Neither  $\Delta vp1388^{MIX}$  nor the other single-gene deletion  
 170 mutants revealed any growth defects (Supplementary Fig. S2B). Therefore,  $\Delta vp1388^{MIX}$  was  
 171 chosen to serve as a *vp1388* strain in subsequent experiments. Surprisingly, VP1390  
 172 expression was absent in the  $\Delta vp1389$  mutant (Supplementary Fig. S2A). We reasoned that this  
 173 deletion resulted in a polar effect.

174

### 175 **VP1388 and VP1390 are both required for operon-mediated toxicity**

176 We previously showed that VP1388 is required for T6SS1-mediated intoxication of a *vp1388-*  
177 *vp1389* deletion prey (Salomon *et al*, 2014a). Since we found no evidence of VP1390 playing a  
178 role in immunity, we hypothesized that it plays a role in the toxic activity mediated by the  
179 tricistronic operon. Indeed, competition assays revealed that both *vp1388* ( $\Delta vp1388^{Mix}$ ) and  
180 *vp1390* ( $\Delta vp1390$ ) mutants were unable to intoxicate the sensitive  $\Delta vp1389$  prey, whereas  
181 exogenous expression of either VP1388 or VP1390 from a plasmid complemented the mutation  
182 (Fig. 2B). Notably, the attacker strains that were used for these assays were generated in a  
183 background in which *hns*, encoding a negative regulator of T6SS1 (Salomon *et al*, 2014b;  
184 Fridman *et al*, 2020), was deleted ( $\Delta hns$ ) to ensure maximal activation of T6SS1. The growth of  
185  $\Delta hns$  derivatives was comparable to that of their parental strain (Supplementary Fig. S3).  
186 Importantly, neither the *vp1388* mutant nor the *vp1390* mutant was impaired in its ability to  
187 intoxicate an *E. coli* prey, which unlike a  $\Delta vp1389$  prey, is expected to be sensitive to toxicity  
188 mediated by other T6SS1 effector and immunity modules (Fig. 2C). These results indicate that  
189 VP1388 and VP1390 are both required for the toxic activity mediated by the tricistronic operon,  
190 but not for overall T6SS1 activity.

191

### 192 **VP1388 and VP1390 interact and are loaded onto the T6SS together**

193 Since both VP1388 and VP1390 are secreted by T6SS1 (Salomon *et al*, 2014a) and are  
194 required for T6SS1-mediated toxicity (Fig. 2B), and since they are genetically linked (Fig. 1), we  
195 hypothesized that the two proteins physically interact. Indeed, immunoprecipitation assays of  
196 proteins co-expressed in *E. coli* confirmed that VP1390 specifically binds VP1388, whereas  
197 neither VP1390 nor VP1388 interacted with a control protein (Fig. 3A).

198 For T6SS-mediated delivery, VP1388 and VP1390 must be loaded onto the T6SS tail tube.  
199 Considering their size, we reasoned that these proteins are not loaded into the narrow Hcp tube  
200 (Silverman *et al*, 2013), but rather, onto the spike comprising the VgrG and PAAR proteins  
201 (Nazarov *et al*, 2017). Therefore, we set out to determine whether VP1388 and VP1390 bind the  
202 T6SS1 spike in *V. parahaemolyticus*. To this end, we employed a strain in which *hcp1* was  
203 deleted; this was intended to prevent T6SS1-mediated secretion, which may result in losing a  
204 protein signal, while presumably retaining the assembly of the T6SS baseplate and spike  
205 (Brunet *et al*, 2015). As shown in Fig. 3B, immunoprecipitated VP1390, but not sfGFP that was  
206 used as a control, interacted with both VP1388 and VgrG1. This result suggests that VP1388  
207 and VP1390 are loaded on the T6SS spike together.

208

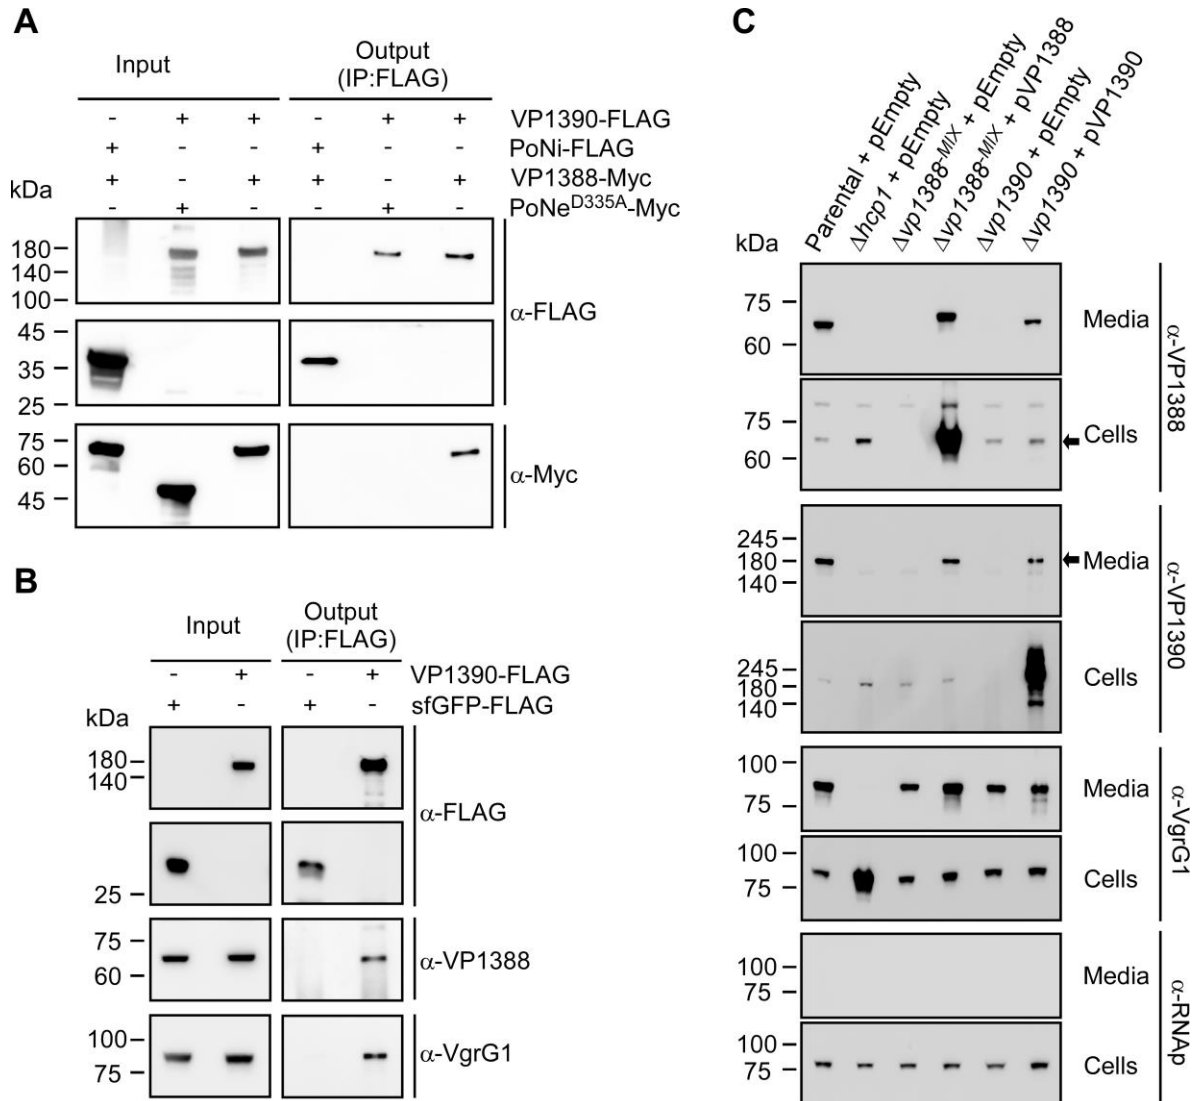

209 **Figure 3. VP1388 and VP1390 are loaded together on the T6SS spike and are secreted co-**  
 210 **dependently. A)** VP1388 binds VP1388. Immunoprecipitation using  $\alpha$ -FLAG antibodies from *E. coli*  
 211 co-expressing the indicated C-terminal FLAG- and Myc-tagged proteins from arabinose-inducible  
 212 plasmids. **B)** VP1388 and VgrG1 co-precipitate with VP1390. Immunoprecipitation using  $\alpha$ -FLAG  
 213 antibodies from *V. parahaemolyticus*  $\Delta hns/\Delta hcp1/\Delta vp1390$  derivatives harboring plasmids for the  
 214 arabinose-inducible expression of FLAG-tagged sfGFP or VP1390. Cells were grown in MLB media  
 215 supplemented with chloramphenicol to maintain the plasmids, and 0.1% arabinose. Endogenous VP1388  
 216 and VgrG1 were detected using  $\alpha$ -VP1388 and  $\alpha$ -VgrG1 antibodies, respectively. **C)** Expression (cells)  
 217 and secretion (media) of VP1388, VP1390, and VgrG1 from the indicated *V. parahaemolyticus*  $\Delta hns$ -  
 218 derived strains harboring an empty plasmid (pEmpty) or plasmids for the arabinose-inducible  
 219 expression of VP1388 (pVP1388) or VP1390 (pVP1390). Samples were grown in media containing 3% NaCl  
 220 and supplemented with 0.1% arabinose at 30 °C. RNA polymerase  $\beta$  (RNAP) was used as a non-secreted  
 221 protein loading control.

222

### 223 **VP1388 and VP1390 are secreted co-dependently**

224 We revealed that VP1388 and VP1390 interact, which led us to investigate whether their  
 225 secretion is co-dependent. To this end, we monitored the secretion of VP1388 in the absence of  
 226 VP1390 and *vice versa*. As shown in Fig. 3C, the secretion of VP1388 was abolished in the

227  $\Delta vp1390$  strain and the secretion of VP1390 was abolished in the  $\Delta vp1388^{MIX}$  strain; however,  
228 their expression was still detected in the absence of their counterpart, suggesting that they are  
229 not obligatory for each other's expression and stability. Exogenous complementation of VP1388  
230 or VP1390 from a plasmid restored their counterpart's secretion. Notably, the absence of  
231 VP1388 or VP1390 did not affect the overall activity of T6SS1, since the secretion of the  
232 hallmark secreted spike protein, VgrG1, was retained in the  $\Delta vp1388^{MIX}$  and  $\Delta vp1390$  strains  
233 (Fig. 3C). Taken together, these results indicate that VP1388 and VP1390 form a  
234 heterocomplex that is required for their respective secretion via T6SS.

235

### 236 **VP1390 is an antibacterial toxin**

237 Next, we set out to characterize the antibacterial activity of this operon and to determine which  
238 of the two secreted proteins mediates it. To this end, we investigated whether VP1388, VP1390,  
239 or both mediate antibacterial toxicity. Since the immunity protein, VP1389, contains an N-  
240 terminal signal peptide for periplasmic localization (Fig. 1A), we reasoned that the toxin will  
241 target this compartment. Therefore, we expressed VP1388 and VP1390, fused to an N-terminal  
242 PelB signal peptide (for periplasmic localization), in the surrogate host *E. coli* and monitored  
243 their effect on bacterial growth. Surprisingly, VP1390, but not VP1388, was toxic to *E. coli* (Fig.  
244 4A). Expression of both VP1388 and VP1390 was detected by immunoblotting (Supplementary  
245 Fig. S4). This result suggests that VP1390 is the toxin responsible for the operon-mediated  
246 toxicity. In support of this notion, VP1390 specifically interacted with the immunity protein,  
247 VP1389, when both were exogenously co-expressed in *V. parahaemolyticus*, as expected from  
248 an effector and immunity pair (Fig. 4B). Notably, since over-expression of VP1389 itself was  
249 toxic in *E. coli*, we were unable to directly examine its ability to antagonize the toxicity mediated  
250 by VP1390 in this host.

251 To investigate the nature of the toxic activity mediated by VP1390, we monitored the  
252 morphological changes that occur in *E. coli* expressing VP1390. As shown in Fig. 4C and  
253 Supplementary Movie. S1, *E. coli* expressing periplasm-targeted VP1390, but not VP1388 or  
254 sfGFP, lysed and exhibited massive blebbing. Lysis was determined by changes in cell  
255 appearance as observed in the phase contrast channel, and by entry of the membrane-  
256 impermeable fluorescent DNA dye, propidium iodide.

257



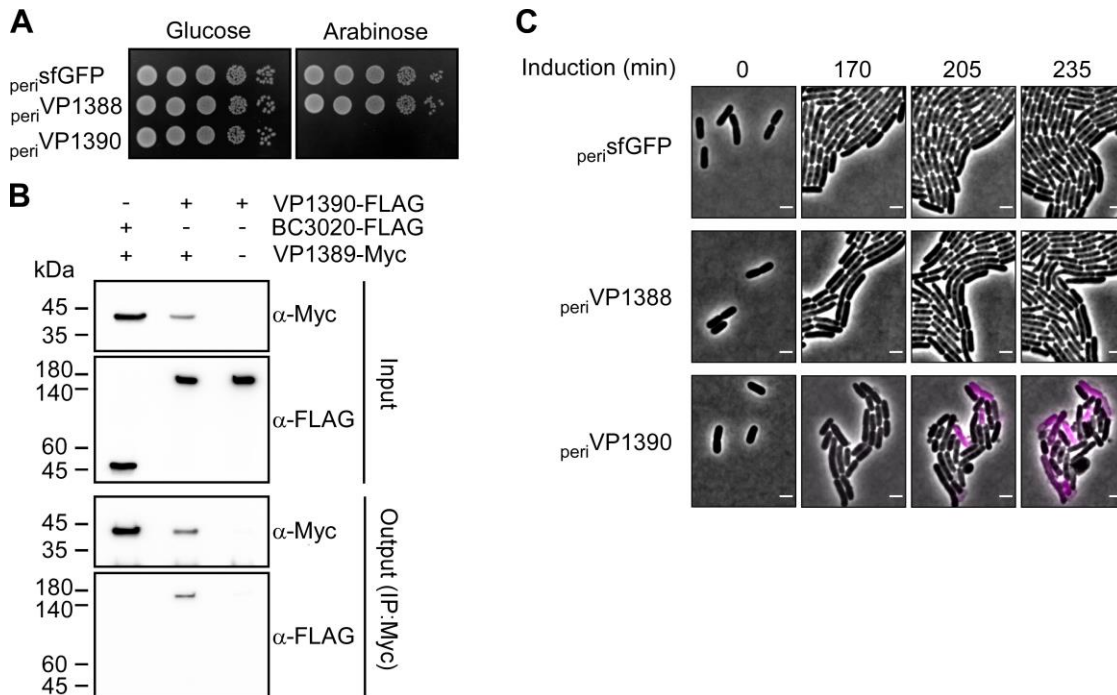

258 **Figure 4. VP1390 is a periplasm-targeting toxin that leads to cell lysis.** **A)** Toxicity of periplasm-  
 259 targeted proteins in *E. coli*. *E. coli* strains containing plasmids for the arabinose-inducible expression of  
 260 sfGFP (used as a control), VP1388 or VP1390 fused to an N-terminal PelB signal peptide ( $_{\text{peri}}$ sfGFP,  
 261  $_{\text{peri}}$ VP1388, and  $_{\text{peri}}$ VP1390, respectively) were spotted at 10-fold serial dilutions onto LB agar plates  
 262 supplemented with kanamycin (to maintain plasmids) and either 0.2% glucose, to repress protein  
 263 expression, or 0.1% arabinose, to induce protein expression. **B)** VP1389 interacts with VP1390. Co-  
 264 immunoprecipitation of FLAG-tagged VP1390 or BC3020 using Myc-tagged VP1389 when co-expressed  
 265 in *V. parahaemolyticus*  $\Delta vp1389$  (input). Precipitated proteins (output) were detected by immunoblotting  
 266 using  $\alpha$ -Myc and  $\alpha$ -FLAG antibodies. **C)** VP1390 induces cell lysis in *E. coli*. Time-lapse microscopy of *E.*  
 267 *coli* cells expressing periplasm-targeted sfGFP, VP1388, or VP1390 ( $_{\text{peri}}$ sfGFP,  $_{\text{peri}}$ VP1388, and  
 268  $_{\text{peri}}$ VP1390, respectively) from an arabinose-inducible vector, grown on LB agarose pads supplemented  
 269 with kanamycin (to maintain the plasmid), 0.2% arabinose (to induce expression), and propidium iodide  
 270 (PI; pink). Merging of the phase contrast and PI channels are shown. Scale bar = 2  $\mu$ m.

271

## 272 **Triad induces T6SS1-mediated cell lysis in septating prey cells**

273 To determine whether the lysis observed in *E. coli* expressing VP1390 is also mediated by the  
 274 tricistronic operon during T6SS1-mediated competition, we monitored GFP-expressing,  
 275 sensitive *V. parahaemolyticus*  $\Delta vp1389$  prey cells during incubation with a T6SS1<sup>+</sup> ( $\Delta hns$ ) or a  
 276 T6SS1<sup>-</sup> ( $\Delta hns/\Delta hcp1$ ) attacker. As shown in Fig. 5 and Supplementary Movie. S2,  $\Delta vp1389$  prey  
 277 cells expressing GFP often lysed after contacting a T6SS1<sup>+</sup> attacker cell. Often ( $62.17 \pm 9.59\%$ ),  
 278 lysis occurred in cells nearing completion of septation. Furthermore, when lysing cells were not  
 279 crowded, a bleb containing cytoplasmic content (as indicated by the presence of GFP in it) often  
 280 emerged from the septum prior to lysis and the entry of propidium iodide (Supplementary Fig.  
 281 S5). Similar phenotypes were not observed in prey cells that were co-incubated with a T6SS1<sup>-</sup>  
 282 attacker, indicating that the lysis resulted from the T6SS1 triad activity. Taken together, these  
 283 results indicate that VP1390 is the toxin component of the *vp1388-vp1390* triad, and that it leads  
 284 to cell lysis upon delivery to the prey periplasm.

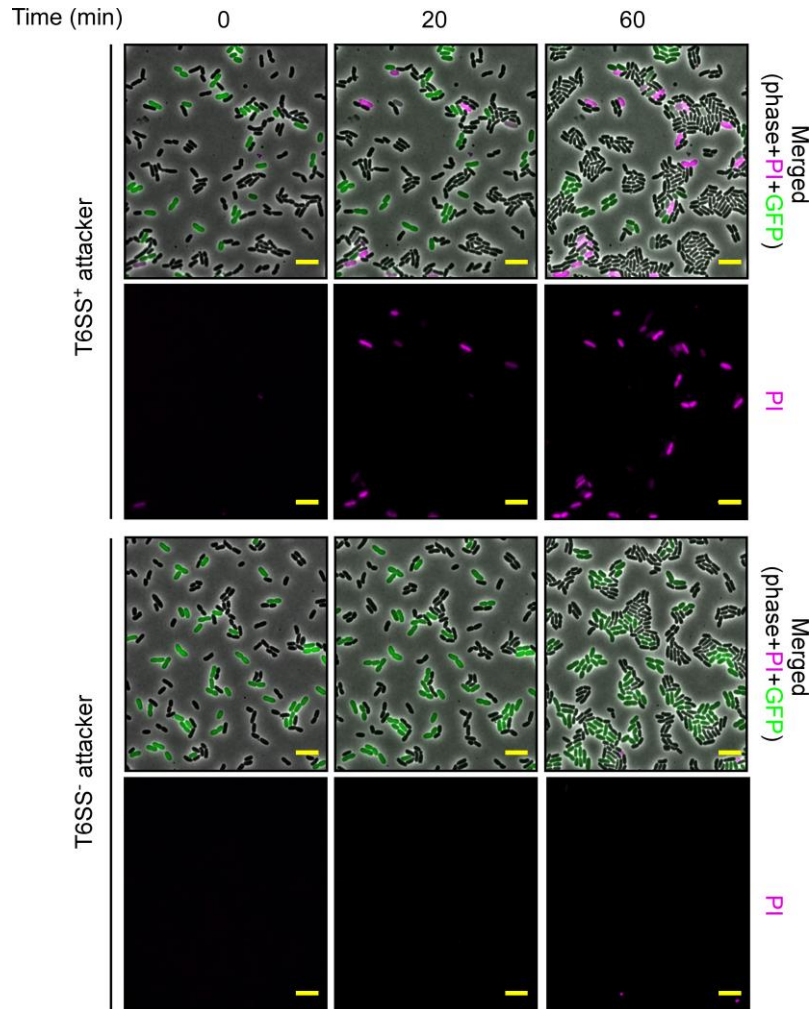

285

286 **Figure 5. Operon-mediated toxicity results in prey cell lysis.** Time-lapse microscopy of competition  
287 between *V. parahaemolyticus*  $\Delta hns$  (T6SS<sup>+</sup>) or  $\Delta hns/\Delta hcp1$  (T6SS<sup>-</sup>) attackers and *V. parahaemolyticus*  
288  $\Delta vp1389$  prey that express GFP. Attacker and prey were mixed (2:1 ratio) and spotted on LB agarose  
289 pads supplemented with propidium iodide (PI; pink). Merging of the phase contrast, GFP (green), and PI  
290 (pink) channels, as well as the PI channel alone are shown. Scale bar = 5  $\mu$ m.

291

## 292 DISCUSSION

293 In this work, we characterized the role of the three proteins encoded in the *V. parahaemolyticus*  
294 T6SS-associated operon, *vp1388-90*, which was previously shown to mediate T6SS-dependent  
295 bacterial competition (Salomon *et al*, 2014a). Our results revealed a new mechanism underlying  
296 T6SS secretion in which VP1388, a MIX domain-containing protein, serves as a co-effector  
297 enabling the T6SS-mediated co-secretion of a novel antibacterial toxin, VP1390. We showed  
298 that VP1388 and VP1390 interact with each other and are loaded on the T6SS spike; we also showed  
299 that they depend on each other for T6SS-mediated secretion. Therefore, we propose that  
300 VP1388 and VP1390 exemplify a previously undescribed mechanism of T6SS secretion, which  
301 we termed “a binary effector module”.

302 In previous works, we and others described diverse examples of polymorphic antibacterial and  
303 anti-eukaryotic T6SS toxins that contain a MIX domain (Bernal *et al*, 2017; Dar *et al*, 2018;

304 Salomon *et al*, 2014a; Ray *et al*, 2017; Salomon *et al*, 2015; Miyata *et al*, 2011). The MIX-  
305 containing VP1388, however, does not appear to exert antibacterial toxicity as would be  
306 expected if it was the toxin responsible for the T6SS-dependent antibacterial toxicity mediated  
307 by T6SS1. Since VP1388 is required for secretion of VP1390, which does mediate antibacterial  
308 toxicity, we concluded that VP1388 plays another role for MIX domain-containing proteins as co-  
309 effectors, enabling the loading and secretion of toxins via T6SS. We hypothesize that VP1388  
310 serves as a tether that connects the toxin, VP1390, to the T6SS spike, possibly to VgrG (Fig. 6).  
311 Nevertheless, although we have made numerous attempts to decipher the molecular  
312 mechanism that is used by VP1388 to enable VP1390 secretion, inconclusive results, possibly  
313 due to the “sticky” nature of the *V. parahaemolyticus* T6SS1 spike proteins, which we have  
314 experienced in some expression systems, prevent us from shedding more light on the  
315 mechanism in detail at this stage.

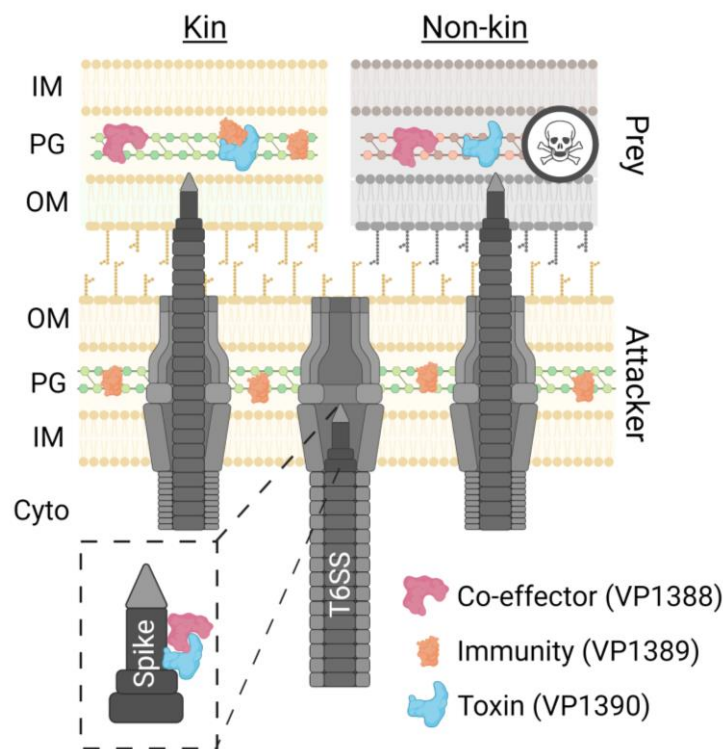

316

317 **Figure 6. Model of T6SS binary effector delivery.** The toxin, VP1390, and its co-effector, VP1388, are  
318 loaded together onto the T6SS spike and are delivered into the periplasm of a neighboring prey cell. If the  
319 prey cell expresses the cognate immunity protein, VP1389, then it can antagonize the attack (kin).  
320 Otherwise, the VP1390 toxin acts in the prey periplasm, leading to cell lysis (non-kin). IM, inner  
321 membrane; PG, peptidoglycan; OM, outer membrane; Cyto, cytoplasm. The figure was created using  
322 BioRender.com.

323

324 Proteins known as adaptors or chaperones were shown to interact with cognate effectors and  
325 T6SS tail tube components to stabilize and mediate the loading of effectors onto the T6SS  
326 (Manera *et al*, 2021). Nevertheless, we contend that VP1388 is not an adaptor or chaperone per  
327 se. First, VP1388 is secreted in a T6SS-dependent manner, whereas adaptors are not. An  
328 exception to this is the secreted tail tube component Hcp, which acts as a chaperone that

329 stabilizes and delivers certain effectors (Silverman *et al*, 2013). However, Hcp, unlike VP1388,  
330 is a conserved and essential T6SS structural component. Second, VP1390 was stably  
331 expressed in *V. parahaemolyticus* even in the absence of VP1388, and it was toxic when  
332 expressed alone in *E. coli*. We cannot, however, rule out the possibility that VP1388 stabilizes at  
333 least some structural part of VP1390, which enables its proper loading onto the T6SS spike.  
334 Intriguingly, the absence of a VP1388 homolog in some bacterial species that encode VP1389  
335 and VP1390-homologous dyads suggests that in these bacteria a different mechanism may be  
336 used to load the VP1390 homologs onto the T6SS spike for secretion.

337 VP1390 is a previously unrecognized antibacterial T6SS effector. It bears no resemblance to  
338 previously described toxins, aside from the OmpA\_C-terminal-like domain, which is predicted to  
339 bind peptidoglycan (Koebnik, 1995). Indeed, we showed that VP1390 exerts its toxicity in the  
340 bacterial periplasm, leading to cell lysis. The morphological phenotypes observed during T6SS-  
341 mediated competition against *V. parahaemolyticus* prey lacking the periplasmic targeted  
342 immunity protein, VP1389, in which the cytosolic content was excreted in a bleb that often  
343 originated from the septum of cells nearing completion of division, suggest that VP1390 targets  
344 the peptidoglycan integrity. This is also supported by the lysis phenotype observed when  
345 VP1390 is expressed in the periplasm of *E. coli*. Future work will determine whether VP1390  
346 indeed targets the peptidoglycan, and if so, whether it directly modifies the cell wall or whether it  
347 does so indirectly by manipulating proteins that regulate the cell wall.

348 The widespread nature of homologous tricistronic operons in marine bacteria, and their  
349 association with T6SSs emphasize their importance to the competitive fitness of these bacteria.  
350 Since many of these marine bacteria are established and emerging pathogens, better  
351 understanding the role of these genes will contribute to our ability to combat them. It remains to  
352 be determined whether other MIX domain-containing proteins serve as co-effectors in binary  
353 effector modules rather than as toxins per se.

354 In conclusion, in this work we revealed a previously undescribed T6SS effector secretion  
355 mechanism, whereby a co-effector that contains a MIX domain, previously thought to only be  
356 present in polymorphic toxins, enables the delivery of a toxin. We also characterized VP1390, a  
357 novel antibacterial toxin that induces bacterial cell lysis by a yet to be determined mechanism.

358

## 359 **MATERIALS AND METHODS**

### 360 **Strains and media**

361 For a complete list of strains used in this study, see [Supplementary Table S1](#). *Escherichia coli*  
362 strains were grown in 2xYT broth (1.6% [wt/vol] tryptone, 1% [wt/vol] yeast extract, and 0.5%  
363 [wt/vol] NaCl) or Lysogeny broth (LB) at 37°C. Media were supplemented with kanamycin (30  
364 µg/mL) or chloramphenicol (10 µg/mL) when appropriate to maintain plasmids. *Vibrio*  
365 *parahaemolyticus* was grown in MLB broth (LB containing 3% [wt/vol] NaCl) or on marine  
366 minimal media (MMM) agar plates (1.5% [wt/vol] agar, 2% [wt/vol] NaCl, 0.4% [wt/vol]  
367 galactose, 5 mM MgSO<sub>4</sub>, 7 mM K<sub>2</sub>SO<sub>4</sub>, 77 mM K<sub>2</sub>HPO<sub>4</sub>, 35 mM KH<sub>2</sub>PO<sub>4</sub>, and 2 mM NHCl) at  
368 30°C. Media were supplemented with kanamycin (250 µg/mL) or chloramphenicol (10 µg/mL)  
369 when appropriate to maintain plasmids.

370

### 371 **Plasmid construction**

372 For a complete list of plasmids used in this study, see [Supplementary Table S2](#). Primers used  
373 for amplification are listed in [Supplementary Table S3](#). For protein expression, the coding  
374 sequences (CDS) of the operon genes encoding NP\_797767.1 (VP1388), NP\_797768.1

375 (VP1389), and NP\_797769.1 (VP1390) were amplified from *V. parahaemolyticus* strain RIMD  
376 2210633 genomic DNA. The CDS of superfolder GFP (sfGFP) was amplified from the plasmid  
377 sfGFP-N1. Amplicons were inserted into the multiple cloning site (MCS) of pBAD/Myc-His,  
378 pBAD33.1 or their derivatives using the Gibson assembly method (Gibson *et al*, 2009) or by  
379 restriction digestion and ligation.

380 Plasmids were introduced into *E. coli* using electroporation or the Zymo Research MIX & Go kit,  
381 according to the manufacturer's protocol. Transformants introduced with arabinose-inducible  
382 vectors were grown on agar plates supplemented with 0.2% [wt/vol] glucose to repress  
383 unwanted expression from the *Pbad* promoter during the subcloning steps. Plasmids were  
384 introduced into *V. parahaemolyticus* via conjugation. Transconjugants were grown on MMM  
385 agar plates supplemented with appropriate antibiotics to maintain the plasmids.

386

### 387 **Construction of deletion strains**

388 For in-frame deletions of the *vp1388* region encoding the MIX domain, *vp1389*, and *vp1390*  
389 from *V. parahaemolyticus* RIMD 2210633 genome, 1 kb upstream and 1 kb downstream of each  
390 gene or region to be deleted were amplified and cloned into pDM4, a Cm<sup>R</sup>Ori6k suicide plasmid  
391 (O'Toole *et al*, 1996) using restriction digestion and ligation. These vectors were transformed  
392 into electrocompetent *E. coli* S17-1 ( $\lambda$  pir) or DH5 $\alpha$  ( $\lambda$  pir), and transferred into *V.*  
393 *parahaemolyticus* via conjugation. Transconjugants were first selected on MMM agar plates  
394 supplemented with chloramphenicol, and then transferred to MMM agar plates supplemented  
395 with sucrose (15% [wt/vol]) for counter-selection and loss of the SacB-containing pDM4.  
396 Deletions were confirmed by PCR. Construction of pDM4 plasmids for deletion of *vp1388* and  
397 *hns* (*vp1133*) was described previously (Salomon *et al*, 2014a, 2014b).

398

### 399 **Bacterial competition assays**

400 Attacker and prey bacterial strains were grown overnight in MLB (*V. parahaemolyticus*) or LB  
401 (*E. coli*) broth supplemented with antibiotics when plasmid maintenance was required. Bacterial  
402 cultures were then normalized to OD<sub>600</sub> = 0.5, and mixed at a 4:1 (attacker:prey) ratio. The  
403 mixtures were spotted on agar assay plates (MLB supplemented with 0.1% [wt/vol] L-arabinose  
404 to induce expression from plasmids) in triplicates and incubated at 30°C for 4 hours. Colony-  
405 forming units (CFU) of prey spotted at t = 0 hours were determined by plating 10-fold serial  
406 dilutions on selective agar plates. After 4 hours (t = 4 h), bacterial spots were scraped from  
407 assay agar plates into 1 mL of LB media. Next, 10-fold serial dilutions were spotted as  
408 described for t = 0 hours, and prey CFU were calculated. Assays were repeated three times  
409 with similar results; the results from a representative experiment are shown.

410

### 411 **Endogenous expression of VP1388 and VP1390 in *V. parahaemolyticus***

412 *V. parahaemolyticus* strains were grown overnight in MLB broth at 30°C. Overnight cultures  
413 were normalized to OD<sub>600</sub> = 0.18 in 5 mL MLB supplemented with 20  $\mu$ M phenamil (an inhibitor  
414 of the polar flagella used to mimic surface sensing activation) to induce the expression of the  
415 T6SS1 genes (Salomon *et al*, 2013). After 5 hours, 1.0 OD<sub>600</sub> units of cells were pelleted and  
416 resuspended in (2X) Tris-Glycine SDS sample buffer (Novex, Life Sciences). Samples were  
417 boiled, and cell lysates were resolved on Mini-PROTEAN TGX Stain-Free™ precast gels (Bio-  
418 Rad) and transferred onto 0.2  $\mu$ m nitrocellulose membranes. For immunoblotting, primary  
419 antibodies specific for VP1388 or VP1390 ( $\alpha$ -VP1388 polyclonal antibody raised in rabbit  
420 against peptide CLAE DLQPVDKETQM, and  $\alpha$ -VP1390 polyclonal antibody raised in rabbit

421 against peptide EDENNDKTYPSWHSC, respectively; GenScript) were used at 1:1000  
422 concentration. Protein signals were visualized in a Fusion FX6 imaging system (Vilber Lourmat)  
423 using enhanced chemiluminescence (ECL) reagents.

424

#### 425 ***Vibrio* growth assays**

426 Overnight cultures of *V. parahaemolyticus* strains were normalized to OD<sub>600</sub> = 0.01 in MLB broth  
427 and transferred to 96-well plates (200 µL per well; n=4). The 96-well plates were incubated in a  
428 microplate reader (BioTek SYNERGY H1) at 30°C with constant shaking at 205 cpm. OD<sub>600</sub>  
429 reads were acquired every 10 minutes.

430

#### 431 **Toxicity in *E. coli***

432 *E. coli* strains carrying the indicated arabinose-inducible expression plasmids were grown in  
433 2xYT broth supplemented with the appropriate antibiotics and 0.2% (wt/vol) glucose at 37°C.  
434 Overnight cultures were washed twice with fresh 2xYT broth to remove residual glucose.  
435 Cultures were then normalized to OD<sub>600</sub> = 1 in 2xYT media supplemented with antibiotics. Next,  
436 10-fold serial dilutions (dilutions 10<sup>-1</sup>-10<sup>-5</sup>) were spotted (5 µL) onto LB agar plates  
437 supplemented with antibiotics (to maintain plasmids) and 0.2% (wt/vol) glucose (to repress  
438 expression from the *P<sub>bad</sub>* promoter) or 0.1% (wt/vol) L-arabinose (to induce protein expression).  
439 Plates were incubated overnight at 30°C. The following morning, plates were imaged using a  
440 Fusion FX6 imaging system (Vilber Lourmat).

441

#### 442 **Protein expression in *E. coli***

443 *E. coli* strains containing arabinose-inducible plasmids for C-terminal Myc-tagged protein  
444 expression were grown in 2xYT broth supplemented with appropriate antibiotics and 0.2%  
445 (wt/vol) glucose at 37°C. Overnight cultures were washed twice with fresh 2xYT broth to remove  
446 residual glucose. Cultures were then normalized to OD<sub>600</sub> = 0.5 in 3 mL 2xYT broth  
447 supplemented with appropriate antibiotics and grown for two hours at 37°C. After 2 hours, 0.1%  
448 (wt/vol) L-arabinose was added to the media to induce protein expression, and cultures were  
449 grown for 2 additional hours at 37°C. Following induction, 0.5 OD<sub>600</sub> units of cells were pelleted  
450 and resuspended in (2X) Tris-Glycine SDS sample buffer (Novex, Life Sciences). Samples were  
451 boiled, and cell lysates were resolved on TGX Stain-Free™ precast gels (Bio-Rad) and  
452 analyzed as mentioned above. For immunoblotting, α-Myc antibodies (Santa Cruz  
453 Biotechnology, 9E10, mouse mAb) were used at 1:1000 dilution.

454

#### 455 ***E. coli* immunoprecipitation assays**

456 To identify the direct interaction between VP1388 and VP1390, *E. coli* BL21 (DE3) cells  
457 harboring pBAD33.1-based plasmids encoding C-terminal FLAG-tagged PoNi  
458 (B5C30\_RS14460) (Jana *et al*, 2019) or VP1390, together with pBAD/Myc-His-based plasmids  
459 encoding VP1388 or PoNe<sup>D335A</sup> (B5C30\_RS14465) (Jana *et al*, 2019) were grown overnight in  
460 2xYT media supplemented with kanamycin and chloramphenicol at 37°C. Overnight cultures  
461 were diluted 1:100 in 50 mL fresh 2xYT media supplemented with appropriate antibiotics, and  
462 grown at 37°C for 2 h. After 2 h, 0.1% (wt/vol) L-arabinose was added to induce protein  
463 expression, and cultures were further grown at 30°C for 4 h. Next, 200 OD<sub>600</sub> units were pelleted  
464 by centrifugation at 3,500 x g for 10 minutes at 4°C. Then, cell pellets were resuspended in 3  
465 mL of Lysis buffer C (150 mM NaCl, 20 mM Tris-HCl pH = 7.5, 1 mM EDTA, and 0.5% [vol/vol])

466 NP-40) supplemented with 0.1 mM PMSF, and were lysed using a high-pressure homogenizer  
467 (Multi cycle cell disruptor, Constant Systems). Cell debris was removed by centrifuging at  
468 15,000 x *g* for 20 minutes at 4°C. Next, 500 µL of supernatant were mixed with 10 µL of  
469 DYKDDDDK Tag antibody (α-FLAG) and incubated for 1 hour at 4°C with constant rotation.  
470 Next, protein A and protein G magnetic beads (12.5 µL each) were mixed and prewashed with  
471 Lysis buffer C, and then mixed with the samples and incubated for an additional hour at 4°C  
472 with constant rotation. Beads were washed eight times with Lysis buffer C (200 µL each time).  
473 Finally, the beads were collected, and bound proteins were eluted by adding 100 µL of (2X)  
474 Tris-Glycine SDS Sample Buffer supplemented with 5% β-mercaptoethanol, followed by heating  
475 at 70°C for 5 minutes. Samples were analyzed by immunoblotting as mentioned above. HRP-  
476 conjugated α-Light Chain-specific secondary antibodies (Jackson ImmunoResearch) were used  
477 to avoid detecting the primary antibodies' heavy chains.

478

### 479 ***Vibrio* immunoprecipitation assays**

480 To detect loading of VP1390 and VP1388 on the T6SS spike, *V. parahaemolyticus* RIMD  
481 2210633  $\Delta hns/\Delta hcp1/\Delta vp1390$  carrying the indicated pBAD33.1-based plasmids for expression  
482 of sfGFP or VP1390 with a C-terminal FLAG tag were grown overnight in MLB broth  
483 supplemented with chloramphenicol at 30°C. Overnight cultures were normalized to OD<sub>600</sub> =  
484 0.18 in 50 mL MLB broth supplemented with antibiotics and 0.1% (wt/vol) L-arabinose (to induce  
485 protein expression), and were grown at 30°C for 4 hours. After 4 hours, 140 OD<sub>600</sub> units were  
486 pelleted at 3,500 x *g* for 10 minutes at 4°C. Then, 3.5 mL of Lysis buffer A (50 mM NaCl, 10 mM  
487 Tris-HCl pH = 7.5, 1 mM EDTA, 0.5% [vol/vol] NP-40, and 0.1 mM PMSF) were added to cell  
488 pellets, which were then incubated with rotation at 4°C for 15 minutes to resuspend the cells.  
489 Cells were then lysed using a high-pressure homogenizer (Multi cycle cell disruptor, Constant  
490 Systems). Cell debris was removed by centrifugation at 15,000 x *g* for 20 minutes at 4°C. Next,  
491 490 µL of supernatant were incubated with 10 µL of DYKDDDDK Tag antibody (α-FLAG) for an  
492 hour at room temperature (RT). Protein A and protein G magnetic beads (25 µL and 10 µL,  
493 respectively), prewashed with Wash buffer A (50 mM NaCl, 10 mM Tris-HCl pH=7.5, 1 mM  
494 EDTA, and 0.5% [vol/vol] NP-40) were added to samples and incubated with constant rotation  
495 for an additional hour at RT. Then, samples were washed three times with Wash buffer, and the  
496 beads were collected. Bound proteins were eluted by adding 50 µL of (2X) Tris-Glycine SDS  
497 Sample Buffer supplemented with 5% β-mercaptoethanol, followed by heating at 70°C for 5  
498 minutes. Samples were analyzed by immunoblotting as mentioned above. HRP-conjugated α-  
499 Light Chain-specific secondary antibodies (Jackson ImmunoReserach) were used to avoid  
500 detecting the primary antibodies' heavy chains.

501 To detect the binding of VP1389 to VP1390, *V. parahaemolyticus* RIMD 2210633  $\Delta vp1389$   
502 (which does not express endogenous VP1389 or VP1390, as shown in [Supplementary Fig.](#)  
503 [S2A](#)) carrying pBAD/Myc-His-based plasmids, either empty or encoding VP1389, together with  
504 pBAD33.1-based plasmids encoding C-terminally FLAG-tagged VP1390 or BC3020 (accession  
505 number NP\_832766.1; used as control), were grown overnight in MLB broth supplemented with  
506 chloramphenicol and kanamycin at 30°C. Overnight cultures were normalized to OD<sub>600</sub> = 0.18 in  
507 50 mL MLB broth supplemented with antibiotics and 0.1% (wt/vol) L-arabinose (to induce  
508 protein expression), and were grown at 30°C for 3 hours. After 3 hours, 100 OD<sub>600</sub> units were  
509 pelleted at 3,500 x *g* for 10 minutes at 4°C. Next, 3 mL of Lysis buffer B (100 mM NaCl, 10 mM  
510 Tris-HCl pH=7.5, 1 mM EDTA, 0.5% [vol/vol] NP-40, and 0.1 mM PMSF) were added to cell  
511 pellets, and cells were lysed, as detailed above. Cell debris was removed as mentioned above.  
512 Next, 500 µL of supernatant were transferred to tubes containing 25 µL of prewashed magnetic  
513 α-Myc beads (Myc-tag [9B11] mouse mAb magnetic beads conjugated #5698; Cell Signaling  
514 Technology) and incubated at 4°C for 2 hours. Then, samples were washed 3 times with Wash

515 buffer B (100 mM NaCl, 10 mM Tris-HCl pH=7.5, 1 mM EDTA, and 0.5% [vol/vol] NP-40), and  
516 bound proteins were eluted by adding 50  $\mu$ L of (2X) Tris-Glycine SDS Sample Buffer  
517 supplemented with 5%  $\beta$ -mercaptoethanol, followed by heating at 70°C for 5 minutes. Samples  
518 were analyzed by immunoblotting as mentioned above.

519

## 520 **Secretion assays**

521 *V. parahaemolyticus* strains were grown overnight in MLB broth supplemented with antibiotics to  
522 maintain plasmids, when needed. Cultures were normalized to OD<sub>600</sub> = 0.18 in 5 mL MLB  
523 supplemented with antibiotics and L-arabinose (0.1% [wt/vol]) to induce expression from *Pbad*  
524 promoters. After 5 hours, 1.0 OD<sub>600</sub> units were collected for expression fractions (cells). The cell  
525 pellets were resuspended in (2X) Tris-Glycine SDS sample buffer (Novex, Life Sciences). For  
526 secretion fractions (media), 10 OD<sub>600</sub> units were filtered (0.22  $\mu$ m), and proteins were  
527 precipitated from the media using deoxycholate and trichloroacetic acid (Bensadoun &  
528 Weinstein, 1976). Cold acetone was used to wash the protein precipitates twice. Then, protein  
529 precipitates were resuspended in 20  $\mu$ L of 10 mM Tris-HCl pH=8, followed by the addition of 20  
530  $\mu$ L of (2X) Tris-Glycine SDS Sample Buffer supplemented with 5%  $\beta$ -mercaptoethanol. Next, 0.5  
531  $\mu$ L of 1 N NaOH was added to maintain a basic pH. Expression and secretion samples were  
532 boiled and then resolved on Mini-PROTEAN or Criterion™ TGX Stain-Free™ precast gels (Bio-  
533 Rad) and analyzed as mentioned above. For immunoblotting, primary antibodies were used at  
534 1:1000 concentration. The following antibodies were used: DYKDDDDK Tag Antibody (D6W5B  
535 rabbit mAb #14793; Cell Signaling Technology; it binds to the same epitope as Sigma's Anti-  
536 FLAG M2 Antibody; it is referred to as  $\alpha$ -FLAG), Direct-Blot™ HRP anti-*E. coli* RNA Sigma 70  
537 (mouse mAb #663205; BioLegend; it is referred to as  $\alpha$ -RNAP), custom-made  $\alpha$ -VgrG1 (Li *et al*,  
538 2017),  $\alpha$ -VP1388 (described above), and  $\alpha$ -VP1390 (described above).  $\alpha$ -RNAP was used to  
539 determine equal loading of samples and to exclude cell lysis. Protein signals were visualized in  
540 a Fusion FX6 imaging system (Vilber Lourmat) using enhanced chemiluminescence (ECL)  
541 reagents.

542

## 543 **Microscopy**

544 To determine the effect of protein expression in *E. coli*, overnight *E. coli* MG1655-derivative  
545 sAJM.1506 cells carrying pPER5-based plasmids were diluted 100-fold into 3 mL of fresh LB  
546 broth supplemented with kanamycin and 0.2% (wt/vol) glucose. After 2 hours of incubation at  
547 37°C, cells were washed and normalized to OD<sub>600</sub> = 0.5. Next, 1  $\mu$ L of each culture was spotted  
548 on LB agarose pads (1% [wt/vol] agarose supplemented with 0.2% [wt/vol] L-arabinose) onto  
549 which 1  $\mu$ L of the membrane-impermeable DNA dye, propidium iodide (PI; 1 mg/mL; Sigma)  
550 had been pre-applied. After the spots had dried (1-2 minutes at RT), the agarose pads were  
551 mounted, facing down, on 35 mm glass bottom CELLview™ cell culture dishes (Greiner). Cells  
552 were then imaged every 5 minutes for 4 hours under a fluorescence microscope, as detailed  
553 below. The stage chamber (Okolab) temperature was set to 37°C.

554 To assess the T6SS1-dependent toxic effect of the tricistronic operon on sensitive prey during  
555 bacterial competition, *V. parahaemolyticus* RIMD 2210633  $\Delta$ *vp1389* prey cells harboring a  
556 plasmid for the constitutive expression of GFP (Ritchie *et al*, 2012) were competed against *V.*  
557 *parahaemolyticus* RIMD 2210633 attacker strain  $\Delta$ *hns* (T6SS1<sup>+</sup>) or  $\Delta$ *hns*/ $\Delta$ *hcp1* (T6SS1<sup>-</sup>).  
558 Bacteria were grown overnight in MLB broth at 30°C. Overnight attacker and prey cultures were  
559 diluted 100-fold into 3 mL of fresh MLB broth and grown for 2 hours at 30°C. After 2 hours,  
560 attacker and prey cultures were normalized to OD<sub>600</sub> = 2.5 and mixed in a 2:1 (attacker:prey)  
561 ratio. Cell mixtures and PI were spotted onto agarose pads and processed as detailed above.



562 Bacteria were imaged every 4 minutes for 1 hour. The stage chamber temperature was set to  
563 30°C.

564 The following setup was used for imaging: a Nikon Eclipse Ti2E inverted motorized microscope  
565 with a CFI PLAN apochromat DM 100X oil lambda PH-3 (NA, 1.45) objective lens, a Lumencor  
566 SOLA SE II 395 light source, and ET-dsRED (#49005, CHROMA, to visualize the PI signal) and  
567 ET-EGFP (#49002, CHROMA, to visualize the GFP signal) filter sets and a DS-QI2 Mono  
568 cooled digital microscope camera (16 MO). The obtained images were further processed and  
569 analyzed using Fiji ImageJ suite (Schindelin *et al*, 2012).

570

### 571 **Construction of position-specific scoring matrices for VP1388, VP1389, and VP1390**

572 The position-specific scoring matrices (PSSMs) of VP1388, VP1389, and VP1390 were  
573 constructed using full-length sequences from *Vibrio parahaemolyticus* RIMD 2210633  
574 (BAC59651.1, BAC59652.1, and BAC59653.1, respectively). The PSSM of a distant homolog of  
575 VP1389 was constructed using the full-length sequence from *Vibrio parahaemolyticus* ISF-77-  
576 01 (WP\_047482080.1). Five iterations of PSI-BLAST were performed against the RefSeq  
577 protein database. In each iteration, a maximum of 500 hits with an expect value threshold of  $10^{-6}$   
578 and a query coverage of 70% were used.

579

### 580 **Identification of homologous operons of *vp1388-90***

581 Homologous operons of *vp1388-vp1390* were identified by searching for homologs of VP1388  
582 and VP1390 in bacterial genomes. A local database containing the RefSeq bacterial nucleotide  
583 and protein sequences was generated (last updated on December 25, 2020). RPS-BLAST was  
584 used to identify VP1388 and VP1390 homologs in the local database. The results were filtered  
585 using an expect value threshold of  $10^{-15}$  and a subject coverage of 70%. Subsequently, the  
586 genomic neighborhood was analyzed as described before (Dar *et al*, 2018; Fridman *et al*, 2020).  
587 Duplicated protein accessions appearing in the same genome in more than one genomic  
588 accession were removed if the same downstream protein existed at the same distance. The  
589 obtained list represented all occurrences of the VP1388 and VP1390 homologs in bacterial  
590 genomes. A list of homologous operons was generated by collecting all occurrences of VP1388  
591 homologs and the occurrences of VP1390 homologs that were not found within 5 genes  
592 downstream of VP1388.

593

### 594 **Identification of VP1388-VP1390 triads and dyads**

595 The list of homologous operons was analyzed. For VP1388 homologs, the following rules were  
596 applied: (1) if a VP1390 homolog was identified 2 to 5 genes downstream of the VP1388  
597 homolog, it was termed 'triad'; (2) if a VP1389 homolog was identified 1 gene downstream of the  
598 VP1388 homolog, it was termed 'other'; (3) otherwise, it was termed 'truncated/pseudo'. For  
599 VP1390 homologs, the following rules were applied: (1) if a VP1388 homolog was identified 2 to  
600 5 genes upstream of the VP1390 homolog, it was termed 'triad'; (2) if a VP1389 homolog was  
601 identified 1 gene upstream of the VP1390 homolog and all of the 2 to 5 genes upstream existed  
602 and were unrelated to VP1388, it was termed 'dyad'; (3) if a VP1388 was identified 1 gene  
603 upstream of the VP1390 homolog, it was termed 'other'; (4) if all of the 5 genes upstream and  
604 downstream existed and were unrelated to VP1388 and VP1389, indicating that the VP1390  
605 homolog was an orphan, it was termed 'other'; (5) otherwise, it was termed 'truncated/pseudo'.  
606 All annotations were assessed manually. Changes were noted in the appropriate  
607 Supplementary Dataset.

608

## 609 **Identification of bacterial genomes encoding T6SS**

610 RPS-BLAST was employed to identify the T6SS core components, as described before (Jana *et*  
611 *al*, 2019). Briefly, the proteins were aligned against 11 COGs that were previously shown to  
612 specifically predict T6SS and were against COG3501 (VgrG) (Boyer *et al*, 2009). Bacterial  
613 genomes encoding at least 9 out of the 11 T6SS core components were identified.

614 BLASTX was employed to identify *Vibrio parahaemolyticus* T6SS1-like cluster proteins in  
615 bacterial genomes, as described before (Fridman *et al*, 2020). Briefly, translated nucleotide  
616 sequences were aligned against the 24 T6SS1 cluster proteins of *Vibrio parahaemolyticus*  
617 RIMD 2210633 (NP\_797770.1 to NP\_797793.1). The minimal similarity percentage (the bit-  
618 score value divided by two times the specific lengths of the cluster proteins) of each protein was  
619 defined as 50%. Bacterial genomes encoding at least 12 out of the 24 T6SS1 cluster proteins  
620 were regarded as harboring a *Vibrio parahaemolyticus* T6SS1-like cluster. Genomes containing  
621 less than 17 of the 24 genes were also evaluated manually.

622

## 623 **Construction of the phylogenetic tree of bacterial strains containing VP1388 and VP1390**

624 Phylogenetic analysis was conducted using the MAFFT server ([mafft.cbrc.jp/alignment/server/](http://mafft.cbrc.jp/alignment/server/)).  
625 DNA sequences of *rpoB* coding for DNA-directed RNA polymerase subunit beta were aligned  
626 using MAFFT v7 FFT-NS-2 (Kato *et al*, 2018, 2002). Partial and pseudogene sequences were  
627 not included in the analysis. The evolutionary history was inferred using the neighbor-joining  
628 method (Saitou & Nei, 1987) with the Jukes-Cantor substitution model (JC69). The analysis  
629 included 1543 nucleotide sequences and 3912 conserved sites.

630

## 631 **CONFLICT OF INTEREST**

632 The authors declare no competing interests.

633

## 634 **ACKNOWLEDGMENTS**

635 This project received funding from the European Research Council (ERC) under the European  
636 Union's Horizon 2020 research and innovation program (Grant agreement No. 714224), and the  
637 Israel Science Foundation (ISF; grant no. 920/17) to DS. We thank members of the Salomon lab  
638 for technical assistance and helpful discussions.

639

## 640 **AUTHOR CONTRIBUTIONS**

641 Conceptualization: YD, BJ, EB, and DS; Methodology: YD, BJ, EB, and DS; Investigation: YD,  
642 BJ, and EB; Supervision: DS; Writing—original draft: DS; Writing—review & editing: YD, BJ, EB,  
643 and DS.

644

## 645 **REFERENCES**

646 Ahmad S, Tsang KK, Sachar K, Quentin D, Tashin TM, Bullen NP, Raunser S, McArthur AG,  
647 Prehna G & Whitney JC (2020) Structural basis for effector transmembrane domain  
648 recognition by type vi secretion system chaperones. *Elife* 9: 1–29

- 649 Alcoforado Diniz J & Coulthurst SJ (2015) Intraspecies Competition in *Serratia marcescens* Is  
650 Mediated by Type VI-Secreted Rhs Effectors and a Conserved Effector-Associated  
651 Accessory Protein. *J Bacteriol* 197: 2350–60
- 652 Basler M, Pilhofer M, Henderson GP, Jensen GJ & Mekalanos JJ (2012) Type VI secretion  
653 requires a dynamic contractile phage tail-like structure. *Nature* 483: 182–6
- 654 Bensadoun A & Weinstein D (1976) Assay of proteins in the presence of interfering materials.  
655 *Anal Biochem* 70: 241–250
- 656 Bernal P, Allsopp LP, Filloux A & Llamas MA (2017) The *Pseudomonas putida* T6SS is a plant  
657 warden against phytopathogens. *ISME J* 11: 972–987
- 658 Berni B, Soscia C, Djermoun S, Ize B & Bleves S (2019) A type VI secretion system trans-  
659 kingdom effector is required for the delivery of a novel antibacterial toxin in *Pseudomonas*  
660 *aeruginosa*. *Front Microbiol* 10: 1218
- 661 Bondage DD, Lin J-S, Ma L-S, Kuo C-H & Lai E-M (2016) VgrG C terminus confers the type VI  
662 effector transport specificity and is required for binding with PAAR and adaptor–effector  
663 complex. *Proc Natl Acad Sci* 113: E3931–E3940
- 664 Boyd EF, Carpenter MR, Chowdhury N, Cohen AL, Haines-Menges BL, Kalburge SS, Kingston  
665 JJ, Lubin JBB, Ongagna-Yhombi SY & Whitaker WB (2015) Post-genomic analysis of  
666 members of the family Vibrionaceae. 3: 1–26
- 667 Boyer F, Fichant G, Berthod J, Vandenbrouck Y & Attree I (2009) Dissecting the bacterial type  
668 VI secretion system by a genome wide in silico analysis: What can be learned from  
669 available microbial genomic resources? *BMC Genomics* 10
- 670 Brunet YR, Zoued A, Boyer F, Douzi B & Cascales E (2015) The type VI secretion TssEFGK-  
671 VgrG phage-like baseplate is recruited to the TssJLM membrane complex via multiple  
672 contacts and serves as assembly platform for tail tube/sheath polymerization. *PLOS Genet*  
673 11: e1005545
- 674 Burkinshaw BJ, Liang X, Wong M, Le ANH, Lam L & Dong TG (2018) A type VI secretion  
675 system effector delivery mechanism dependent on PAAR and a chaperone-co-chaperone  
676 complex. *Nat Microbiol* 3: 632–640
- 677 Cianfanelli FR, Alcoforado Diniz J, Guo M, De Cesare V, Trost M & Coulthurst SJ (2016) VgrG  
678 and PAAR proteins define distinct versions of a functional type VI secretion system. *PLoS*  
679 *Pathog* 12: 1–27
- 680 Dar Y, Salomon D & Bosis E (2018) The antibacterial and anti-eukaryotic Type VI secretion  
681 system MIX-effector repertoire in Vibrionaceae. *Mar Drugs* 16: 433
- 682 Flaugnatti N, Le TTH, Canaan S, Aschtgen M-S, Nguyen VS, Blangy S, Kellenberger C,  
683 Roussel A, Cambillau C, Cascales E, *et al* (2016) A phospholipase A<sub>1</sub> antibacterial Type  
684 VI secretion effector interacts directly with the C-terminal domain of the VgrG spike protein  
685 for delivery. *Mol Microbiol* 99: 1099–1118
- 686 Flaugnatti N, Rapisarda C, Rey M, Beauvois SG, Nguyen VA, Canaan S, Durand E, Chamot-  
687 Rooke J, Cascales E, Fronzes R, *et al* (2020) Structural basis for loading and inhibition of a  
688 bacterial T6 <scp>SS</scp> phospholipase effector by the VgrG spike. *EMBO J* 39
- 689 Fridman CM, Keppel K, Gerlic M, Bosis E & Salomon D (2020) A comparative genomics  
690 methodology reveals a widespread family of membrane-disrupting T6SS effectors. *Nat*  
691 *Commun* 11: 1085
- 692 Gibson DG, Young L, Chuang RY, Venter JC, Hutchison CA & Smith HO (2009) Enzymatic

- 693 assembly of DNA molecules up to several hundred kilobases. *Nat Methods* 6: 343–345
- 694 Hachani A, Allsopp LP, Oduko Y & Filloux A (2014) The VgrG proteins are ‘à la carte’ delivery  
695 systems for bacterial type VI effectors. *J Biol Chem* 289: 17872–84
- 696 Hood RD, Singh P, Hsu FS, Güvener T, Carl MA, Trinidad RRS, Silverman JM, Ohlson BB,  
697 Hicks KG, Plemel RL, *et al* (2010) A type VI secretion system of *Pseudomonas aeruginosa*  
698 targets a toxin to bacteria. *Cell Host Microbe* 7: 25–37
- 699 Horseman MA, Bray R, Lujan-Francis B & Matthew E (2013) Infections Caused by  
700 *Vibrionaceae*. *Infect Dis Clin Pract* 21: 222–232
- 701 Hubert CL & Michell SL (2020) A universal oyster infection model demonstrates that *Vibrio*  
702 *vulnificus* Type 6 secretion systems have antibacterial activity *in vivo*. *Environ*  
703 *Microbiol* 22: 4381–4393
- 704 Jana B, Fridman CM, Bosis E & Salomon D (2019) A modular effector with a DNase domain  
705 and a marker for T6SS substrates. *Nat Commun* 10: 3595
- 706 Katoh K, Misawa K, Kuma K & Miyata T (2002) MAFFT: a novel method for rapid multiple  
707 sequence alignment based on fast Fourier transform. *Nucleic Acids Res* 30: 3059–66
- 708 Katoh K, Rozewicki J & Yamada KD (2018) MAFFT online service: Multiple sequence  
709 alignment, interactive sequence choice and visualization. *Brief Bioinform* 20: 1160–1166
- 710 Koebnik R (1995) Proposal for a peptidoglycan-associating alpha-helical motif in the C-terminal  
711 regions of some bacterial cell-surface proteins. *Mol Microbiol* 16: 1269–1270
- 712 Lai H-C, Ng TH, Ando M, Lee C-T, Chen I-T, Chuang J-C, Mavichak R, Chang S-H, Yeh M-D,  
713 Chiang Y-A, *et al* (2015) Pathogenesis of acute hepatopancreatic necrosis disease  
714 (AHPND) in shrimp. *Fish Shellfish Immunol* 47: 1006–1014
- 715 Li P, Kinch LN, Ray A, Dalia AB, Cong Q, Nunan LM, Camilli A, Grishin N V, Salomon D & Orth  
716 K (2017) Acute hepatopancreatic necrosis disease-causing *Vibrio parahaemolyticus* strains  
717 maintain an antibacterial type VI secretion system with versatile effector repertoires. *Appl*  
718 *Environ Microbiol* 83: e00737-17
- 719 Liang X, Moore R, Wilton M, Wong MJQ, Lam L & Dong TG (2015) Identification of divergent  
720 type VI secretion effectors using a conserved chaperone domain. *Proc Natl Acad Sci* 112:  
721 9106–9111
- 722 Ma J, Pan Z, Huang J, Sun M, Lu C & Yao H (2017) The Hcp proteins fused with diverse  
723 extended-toxin domains represent a novel pattern of antibacterial effectors in type VI  
724 secretion systems. *Virulence* 8: 1189–1202
- 725 MacIntyre DL, Miyata ST, Kitaoka M & Pukatzki S (2010) The *Vibrio cholerae* type VI secretion  
726 system displays antimicrobial properties. *Proc Natl Acad Sci* 107: 19520–19524
- 727 Manera K, Kamal F, Burkinshaw B & Dong TG (2021) Essential functions of chaperones and  
728 adaptors of protein secretion systems in Gram-negative bacteria. *FEBS J*
- 729 Miyata ST, Kitaoka M, Brooks TM, McAuley SB & Pukatzki S (2011) *Vibrio cholerae* requires the  
730 type VI secretion system virulence factor *vasX* to kill *dictyostelium discoideum*. *Infect*  
731 *Immun* 79: 2941–2949
- 732 Mougous JD, Cuff ME, Raunser S, Shen A, Zhou M, Gifford CA, Goodman AL, Joachimiak G,  
733 Ordoñez CL, Lory S, *et al* (2006) A virulence locus of *Pseudomonas aeruginosa* encodes a  
734 protein secretion apparatus. *Science* (80- ) 312: 1526–1530
- 735 Nazarov S, Schneider JP, Brackmann M, Goldie KN, Stahlberg H & Basler M (2017) Cryo-EM

- 736 reconstruction of Type VI secretion system baseplate and sheath distal end. *EMBO J* 37:  
737 e201797103
- 738 Newton A, Kendall M, Vugia DJ, Henao OL & Mahon BE (2012) Increasing Rates of Vibriosis in  
739 the United States, 1996–2010: Review of Surveillance Data From 2 Systems. *Clin Infect*  
740 *Dis* 54: S391–S395
- 741 O’Toole R, Milton DL & Wolf-Watz H (1996) Chemotactic motility is required for invasion of the  
742 host by the fish pathogen *Vibrio anguillarum*. *Mol Microbiol* 19: 625–637
- 743 Pukatzki S, Ma AT, Revel AT, Sturtevant D & Mekalanos JJ (2007) Type VI secretion system  
744 translocates a phage tail spike-like protein into target cells where it cross-links actin. *Proc*  
745 *Natl Acad Sci* 104: 15508–15513
- 746 Pukatzki S, Ma AT, Sturtevant D, Krastins B, Sarracino D, Nelson WC, Heidelberg JF &  
747 Mekalanos JJ (2006) Identification of a conserved bacterial protein secretion system in  
748 *Vibrio cholerae* using the *Dictyostelium* host model system. *Proc Natl Acad Sci* 103: 1528–  
749 1533
- 750 Quentin D, Ahmad S, Shanthamoorthy P, Mougous JD, Whitney JC & Raunser S (2018)  
751 Mechanism of loading and translocation of type VI secretion system effector Tse6. *Nat*  
752 *Microbiol* 3: 1142–1152
- 753 Ray A, Schwartz N, Souza Santos M, Zhang J, Orth K, Salomon D, de Souza Santos M, Zhang  
754 J, Orth K & Salomon D (2017) Type VI secretion system MIX-effectors carry both  
755 antibacterial and anti-eukaryotic activities. *EMBO Rep* 18: e201744226
- 756 Ritchie JM, Rui H, Zhou X, Iida T, Kodoma T, Ito S, Davis BM, Bronson RT & Waldor MK (2012)  
757 Inflammation and Disintegration of Intestinal Villi in an Experimental Model for *Vibrio*  
758 *parahaemolyticus*-Induced Diarrhea. *PLoS Pathog* 8: e1002593
- 759 Russell AB, Hood RD, Bui NK, Leroux M, Vollmer W & Mougous JD (2011) Type VI secretion  
760 delivers bacteriolytic effectors to target cells. *Nature* 475: 343–349
- 761 Russell AB, Singh P, Brittnacher M, Bui NK, Hood RD, Carl MA, Agnello DM, Schwarz S,  
762 Goodlett DR, Vollmer W, *et al* (2012) A widespread bacterial type VI secretion effector  
763 superfamily identified using a heuristic approach. *Cell Host Microbe* 11: 538–549
- 764 Saitou N & Nei M (1987) The neighbor-joining method: a new method for reconstructing  
765 phylogenetic trees. *Mol Biol Evol* 4: 406–425
- 766 Salomon D, Gonzalez H, Updegraff BL & Orth K (2013) *Vibrio parahaemolyticus* Type VI  
767 secretion system 1 is activated in marine conditions to target bacteria, and is differentially  
768 regulated from system 2. *PLoS One* 8: e61086
- 769 Salomon D, Kinch LN, Trudgian DC, Guo X, Klimko JA, Grishin N V., Mirzaei H & Orth K  
770 (2014a) Marker for type VI secretion system effectors. *Proc Natl Acad Sci* 111: 9271–9276
- 771 Salomon D, Klimko JA & Orth K (2014b) H-NS regulates the *Vibrio parahaemolyticus* type VI  
772 secretion system 1. *Microbiol (United Kingdom)* 160: 1867–1873
- 773 Salomon D, Klimko JA, Trudgian DC, Kinch LN, Grishin N V., Mirzaei H & Orth K (2015) Type VI  
774 secretion system toxins horizontally shared between marine bacteria. *PLoS Pathog* 11: 1–  
775 20
- 776 Schindelin J, Arganda-Carreras I, Frise E, Kaynig V, Longair M, Pietzsch T, Preibisch S,  
777 Rueden C, Saalfeld S, Schmid B, *et al* (2012) Fiji: an open-source platform for biological-  
778 image analysis. *Nat Methods* 9: 676–682

- 779 Shneider MM, Buth SA, Ho BT, Basler M, Mekalanos JJ & Leiman PG (2013) PAAR-repeat  
780 proteins sharpen and diversify the type VI secretion system spike. *Nature* 500: 350–353
- 781 Silverman JM, Agnello DM, Zheng H, Andrews BT, Li M, Catalano CE, Gonen T & Mougous JD  
782 (2013) Haemolysin coregulated protein is an exported receptor and chaperone of type VI  
783 secretion substrates. *Mol Cell* 51: 584–593
- 784 Speare L, Cecere AG, Guckes KR, Smith S, Wollenberg MS, Mandel MJ, Miyashiro T & Septer  
785 AN (2018) Bacterial symbionts use a type VI secretion system to eliminate competitors in  
786 their natural host. *Proc Natl Acad Sci U S A* 115: E8528–E8537
- 787 Tran L, Nunan L, Redman R, Mohny L, Pantoja C, Fitzsimmons K & Lightner D (2013)  
788 Determination of the infectious nature of the agent of acute hepatopancreatic necrosis  
789 syndrome affecting penaeid shrimp. *Dis Aquat Organ* 105: 45–55
- 790 Unterweger D, Kostiuk B, Ötjengerdes R, Wilton A, Diaz-Satizabal L & Pukatzki S (2015)  
791 Chimeric adaptor proteins translocate diverse type VI secretion system effectors in *Vibrio*  
792 *cholerae*. *EMBO J* 34: 2198–210
- 793 Wang J, Brackmann M, Castaño-Díez D, Kudryashev M, Goldie KN, Maier T, Stahlberg H &  
794 Basler M (2017) Cryo-EM structure of the extended type VI secretion system sheath-tube  
795 complex. *Nat Microbiol* 2: 1507–1512
- 796 Wettstadt S, Wood TE, Fecht S & Filloux A (2019) Delivery of the *Pseudomonas aeruginosa*  
797 phospholipase effectors PldA and PldB in a VgrG- And H2-T6SS-dependent manner. *Front*  
798 *Microbiol* 10: 1718
- 799 Yu Y, Yang H, Li J, Zhang P, Wu B, Zhu B, Zhang Y & Fang W (2012) Putative type VI  
800 secretion systems of *Vibrio parahaemolyticus* contribute to adhesion to cultured cell  
801 monolayers. *Arch Microbiol* 194: 827–835
- 802 Zhang L & Orth K (2013) Virulence determinants for *Vibrio parahaemolyticus* infection. *Curr*  
803 *Opin Microbiol* 16: 70–77
